# Supplementary material
Source: PubMed Central journal article supplement (PMC3330692)
Supplement: hdy2011103x1.pdf [file hdy2011103x1.pdf]

# Supplementary Information

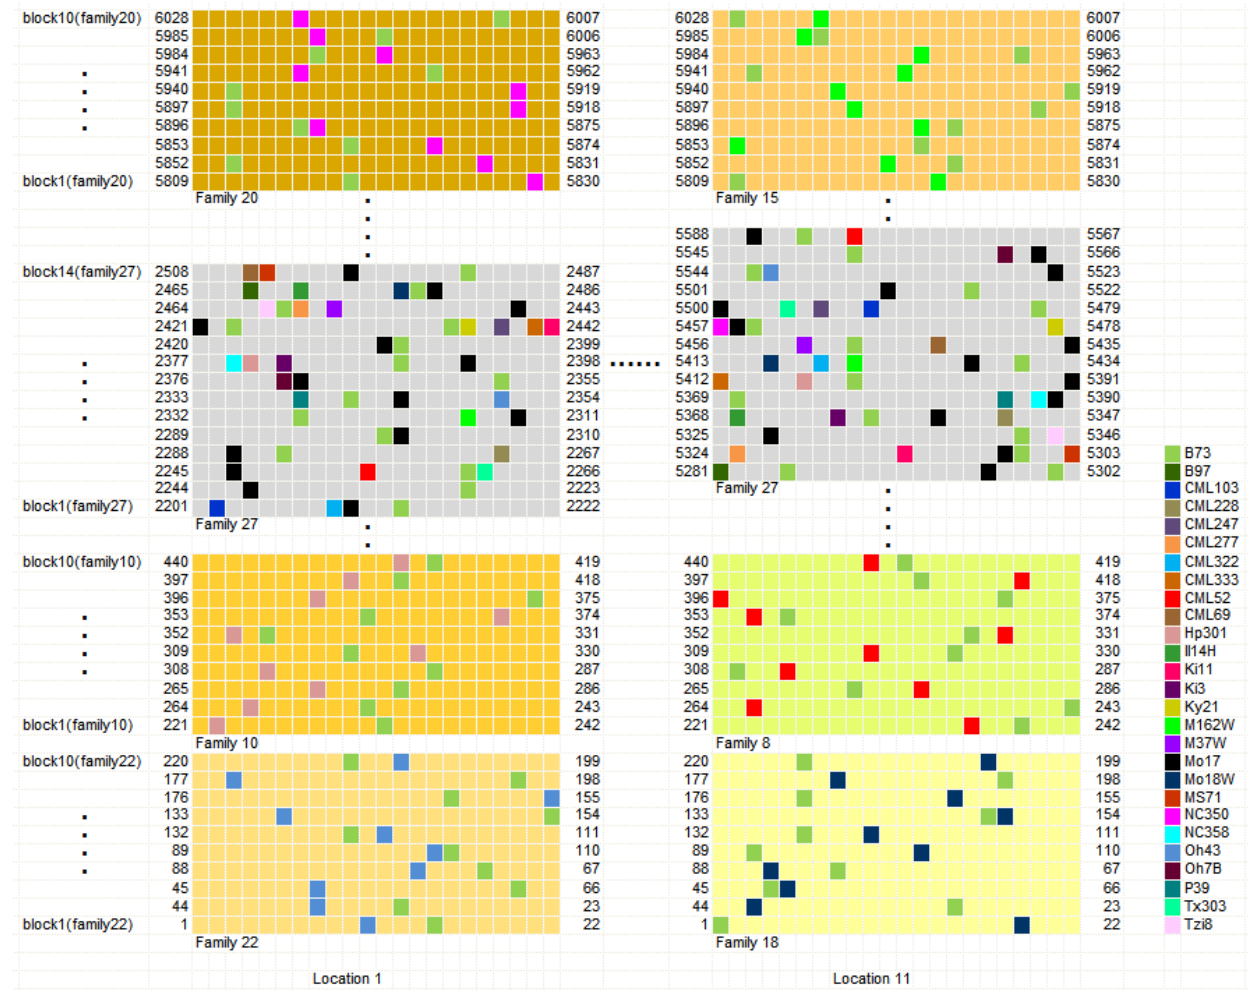

Supplementary Figure 1. An example field layout of NAM. Each family contains its 200 RILs and both parents. Note that the gray boxes in family 27 are all different lines.

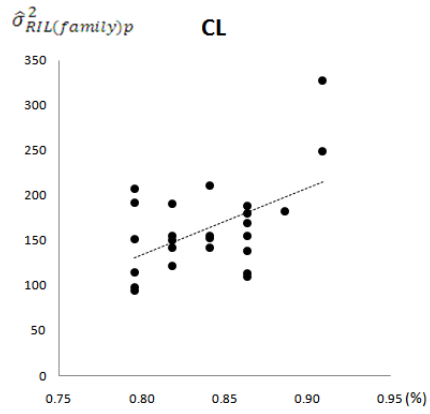

Supplementary Figure 2. Significant regression of GVC on SSR-based GD. X-axis is GDssr and Y-axis is GVC. Only CL exhibited a significant regression of GVC on GDssr.

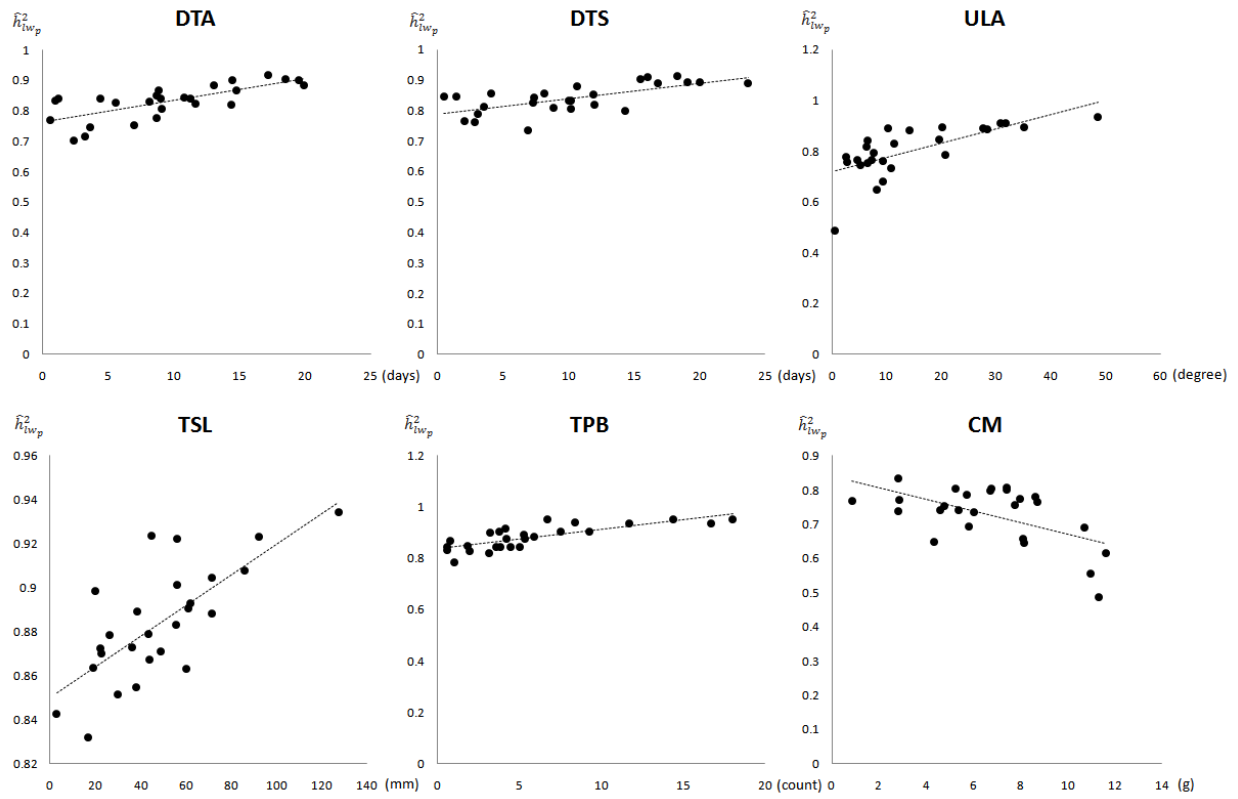

Supplementary Figure 3. Significant regressions of within-family heritability on PD. X-axis is PD and Y-axis is within-family heritability. Only CM exhibited a negative regression slope

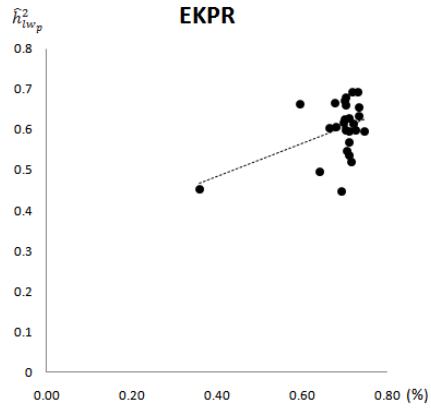

Supplementary Figure 4. Significant regression of within-family heritability on GDsnp. X-axis is GDsnp and Y-axis is within-family heritability. Only EKPR had a significant regression coefficient.

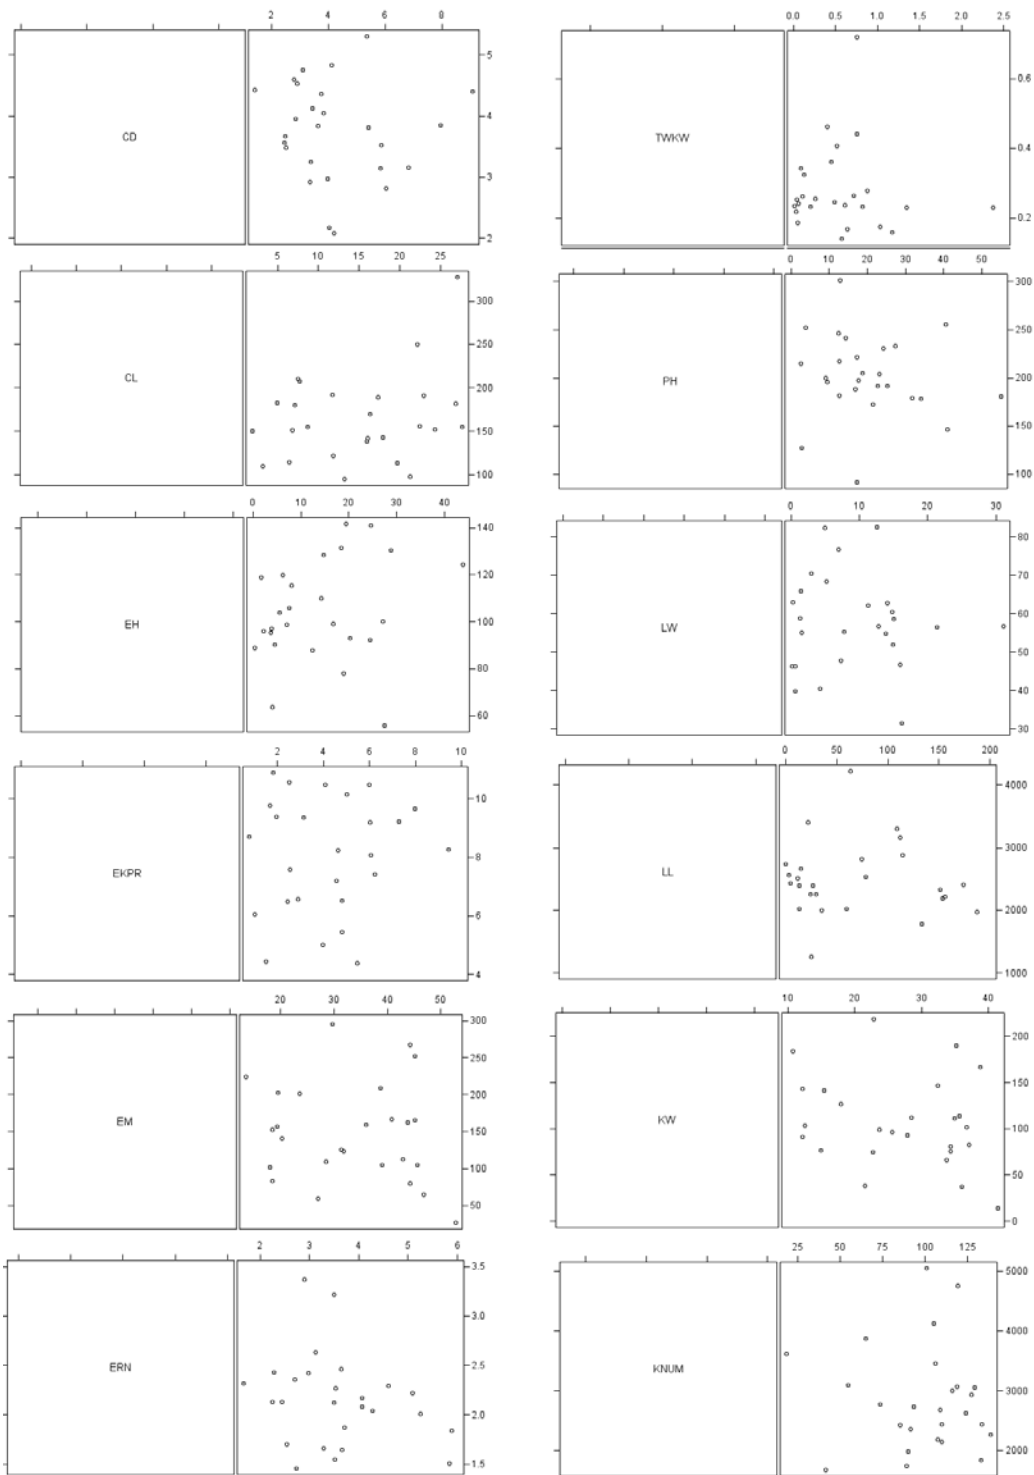

Supplementary Figure 5. Non-significant regressions of within-family GVC on PD. X-axis is PD and Y-axis is within-family GVC for each trait.

Supplementary Table 1. Environments in which each trait was measured on NAM and IBM RIL families and maize diversity panel.

| Trait categories       | Trait                           | Environments in which trait was evaluated                        |
|------------------------|---------------------------------|------------------------------------------------------------------|
| Flowering              | Days to anthesis (DTA)          | NC06, MO06, NY06, IL06, NC07, MO07, NY07, IL07                   |
|                        | Days to silk (DTS)              | NC06, MO06, NY06, IL06, NC07, MO07, NY07, IL07                   |
|                        | Anthesis-silking interval (ASI) | NC06, MO06, NY06, IL06, NC07, MO07, NY07, IL07                   |
| Height and development | Plant height (PH)               | NC06, MO06, NY06, IL06, FL06, PR06, NC07, MO07, NY07, IL07, FL07 |
|                        | Ear height (EH)                 | NC06, MO06, NY06, IL06, FL06, PR06, NC07, MO07, NY07, IL07, FL07 |
| Male inflorescence     | Tassel length (TSL)             | NC06, MO06, NY06, IL06, FL06, PR06, NY07, IL07                   |
|                        | Tassel prime branches (TPB)     | NC06, MO06, NY06, IL06, FL06, PR06, NY07, IL07                   |
| Female inflorescence   | Ear row number (ERN)            | NC06, NY06, IL06, FL06, PR06, NC07                               |
|                        | Cob diameter (CD)               | NC06, NY06, IL06, FL06, PR06, NC07                               |
|                        | Cob length (CL)                 | NC06, NY06, IL06, FL06, PR06, NC07                               |
|                        | Number of Kernel per row (EKPR) | NC06, NY06, IL06, FL06, PR06, NC07                               |
| Leaf morphology        | Upper leaf angle (ULA)          | NC06, MO06, NY06, IL06, FL06, PR06, NC07, NY07, IL07             |
|                        | Leaf length (LL)                | NC06, MO06, NY06, IL06, FL06, PR06, NC07, NY07, IL07             |
|                        | Leaf width (LW)                 | NC06, MO06, NY06, IL06, FL06, PR06, NC07, NY07, IL07             |
| Seed traits            | Ear mass (EM)                   | NC06, NY06, IL06, FL06, PR06, NC07                               |
|                        | Cob mass (CM)                   | NC06, NY06, IL06, FL06, PR06, NC07                               |
|                        | Total seed weight (KW)          | NC06, NY06, IL06, FL06, PR06, NC07                               |
|                        | 20-kernel weight (TWKW)         | NC06, NY06, FL06, PR06, NC07                                     |
|                        | Total Kernel number (KNUM)      | NC06, NY06, FL06, PR06, NC07                                     |

Supplementary Table 2. Within-family genetic variance component ( $\hat{\sigma}_{RIL(family)_p}^2$ ) estimates for each trait.

| Family | Pedigree          | ASI  | DTA   | DTS    | PH     | EH     | LL       | LW     | ULA    | TSL     | TPB   | CD   | CL     | ERN  | EKPR  | EM     | CM    | KW     | TWKW | KNUM    |
|--------|-------------------|------|-------|--------|--------|--------|----------|--------|--------|---------|-------|------|--------|------|-------|--------|-------|--------|------|---------|
| 1      | B73×B97           | 0.63 | 2.71  | 3.13   | 181.11 | 105.90 | 4221.25  | 56.60  | 24.56  | 772.26  | 5.37  | 2.18 | 114.24 | 1.55 | 6.58  | 83.60  | 6.06  | 76.00  | 0.24 | 2422.37 |
| 2      | B73×CML103        | 0.56 | 2.83  | 2.66   | 246.48 | 128.46 | 2744.30  | 82.57  | 54.25  | 947.65  | 5.14  | 3.67 | 210.47 | 2.63 | 9.77  | 224.17 | 11.90 | 183.75 | 0.41 | 3870.71 |
| 3      | B73×CML228        | 0.80 | 7.81  | 8.38   | 217.06 | 115.42 | 2212.59  | 82.40  | 23.98  | 878.35  | 3.26  | 3.52 | 182.90 | 1.87 | 6.51  | 125.71 | 13.68 | 96.46  | 0.25 | 2440.59 |
| 4      | B73×CML247        | 1.14 | 7.76  | 8.82   | 204.23 | 95.99  | 3297.77  | 46.35  | 22.24  | 801.64  | 5.94  | 4.13 | 98.08  | 2.43 | 4.38  | 105.16 | 10.40 | 75.36  | 0.14 | 3074.15 |
| 5      | B73×CML277        | 0.93 | 9.68  | 10.62  | 214.81 | 119.85 | 2504.56  | 46.33  | 21.97  | 836.62  | 2.37  | 2.97 | 152.50 | 1.84 | 8.26  | 252.11 | 15.91 | 166.30 | 0.24 | 2273.55 |
| 6      | B73×CML322        | 0.97 | 4.46  | 5.00   | 232.99 | 98.70  | 2436.46  | 40.45  | 64.39  | 748.37  | 3.94  | 3.83 | 94.95  | 2.32 | 4.45  | 59.09  | 9.32  | 38.57  | 0.16 | 1678.05 |
| 7      | B73×CML333        | 0.57 | 4.45  | 4.45   | 127.50 | 93.03  | 2258.19  | 76.73  | 23.01  | 608.33  | 14.22 | 4.36 | 142.48 | 2.04 | 7.41  | 162.84 | 13.09 | 101.89 | 0.24 | 2628.21 |
| 8      | B73×CML52         | 0.80 | 6.19  | 8.37   | 301.23 | 130.54 | 2873.78  | 39.82  | 63.72  | 1041.69 | 10.57 | 2.82 | 142.06 | 2.22 | 6.50  | 112.72 | 6.96  | 80.38  | 0.17 | 3457.39 |
| 9      | B73×CML69         | 0.73 | 3.66  | 3.78   | 195.21 | 88.95  | 2401.34  | 56.53  | 38.14  | 812.75  | 3.75  | 4.59 | 169.67 | 2.01 | 9.66  | 166.78 | 10.87 | 113.73 | 0.34 | 1833.64 |
| 10     | B73×Hp301         | 0.72 | 4.08  | 5.27   | 230.60 | 103.68 | 2563.85  | 62.06  | 56.57  | 1357.72 | 10.89 | 4.41 | 191.99 | 1.66 | 6.04  | 26.89  | 6.03  | 13.59  | 0.23 | 1749.72 |
| 11     | B73×H14H          | 0.57 | 4.44  | 5.90   | 197.62 | 140.95 | 3402.04  | 46.76  | 75.78  | 1191.92 | 4.52  | 4.84 | 181.95 | 3.22 | 9.19  | 165.44 | 9.41  | 110.75 | 0.25 | 3057.18 |
| 12     | B73×Ki11          | 0.81 | 7.51  | 9.82   | 191.68 | 90.20  | 3161.90  | 58.61  | 15.65  | 1138.03 | 6.30  | 4.43 | 150.19 | 2.46 | 7.20  | 140.53 | 18.07 | 99.07  | 0.19 | 2149.16 |
| 13     | B73×Ki3           | 0.72 | 4.27  | 5.51   | 178.32 | 87.76  | 2257.21  | 54.86  | 28.18  | 583.38  | 3.74  | 4.53 | 327.34 | 2.13 | 9.21  | 159.37 | 14.49 | 111.60 | 0.22 | 2439.21 |
| 14     | B73×Ky21          | 0.68 | 2.46  | 4.03   | 91.62  | 63.68  | 2000.65  | 47.82  | 6.44   | 694.15  | 6.32  | 3.24 | 151.36 | 2.17 | 10.56 | 156.47 | 11.59 | 126.78 | 0.46 | 4125.37 |
| 15     | B73×M162W         | 0.83 | 3.98  | 5.03   | 191.41 | 97.03  | 2661.62  | 62.85  | 39.22  | 740.35  | 3.29  | 4.76 | 190.42 | 1.70 | 10.16 | 201.88 | 14.35 | 141.46 | 0.44 | 2361.36 |
| 16     | B73×M37W          | 0.64 | 3.85  | 4.55   | 221.02 | 110.04 | 2025.01  | 68.43  | 69.58  | 1448.70 | 4.91  | 2.91 | 122.01 | 2.08 | 5.45  | 208.74 | 14.08 | 146.25 | 0.32 | 2687.49 |
| 17     | B73×Mo17 (IBM)    | 0.83 | 4.67  | 6.10   | 205.14 | 99.18  | 2193.85  | 62.89  | 55.92  | 1308.57 | 3.75  | 3.85 | 249.57 | 1.51 | 9.38  | 202.24 | 13.28 | 142.83 | 0.36 | 2775.87 |
| 18     | B73×Mo18W         | 1.57 | 6.28  | 9.09   | 187.82 | 95.14  | 1778.27  | 65.93  | 20.26  | 1642.54 | 10.21 | 4.04 | 155.38 | 2.13 | 10.48 | 267.06 | 11.56 | 189.94 | 0.28 | 4755.52 |
| 19     | B73×MS71          | 0.61 | 1.96  | 3.17   | 146.34 | 55.74  | 1261.50  | 31.54  | 33.64  | 701.10  | 6.89  | 2.08 | 109.77 | 1.64 | 5.02  | 122.84 | 9.84  | 93.16  | 0.26 | 1988.47 |
| 20     | B73×NC350         | 0.90 | 4.03  | 5.29   | 255.60 | 92.38  | 2529.01  | 51.81  | 29.54  | 1057.80 | 8.87  | 3.14 | 154.86 | 3.37 | 8.08  | 80.25  | 4.70  | 66.28  | 0.23 | 3004.75 |
| 21     | B73×NC358         | 0.50 | 2.46  | 3.71   | 172.08 | 77.81  | 2335.40  | 58.76  | 25.19  | 755.46  | 7.04  | 5.31 | 179.90 | 2.29 | 7.58  | 108.81 | 13.31 | 74.89  | 0.23 | 2738.17 |
| 22     | B73×Oh43          | 0.90 | 2.01  | 4.21   | 178.85 | 100.20 | 2819.12  | 55.12  | 53.37  | 985.48  | 3.68  | 3.95 | 154.87 | 2.13 | 10.88 | 101.62 | 9.70  | 91.47  | 0.26 | 3619.16 |
| 23     | B73×Oh7B          | 0.87 | 3.42  | 4.05   | 199.65 | 118.67 | 2027.26  | 70.46  | 22.02  | 828.01  | 4.78  | 3.16 | 207.79 | 1.46 | 8.71  | 152.70 | 10.18 | 103.52 | 0.23 | 3096.72 |
| 24     | B73×P39           | 0.62 | 5.59  | 5.98   | 180.42 | 124.33 | 1968.02  | 56.68  | 103.30 | 880.90  | 4.21  | 3.82 | 113.28 | 2.42 | 9.35  | 64.69  | 3.91  | 37.45  | 0.23 | 2183.29 |
| 25     | B73×Tx303         | 1.45 | 4.60  | 7.10   | 241.31 | 131.45 | 2391.88  | 55.31  | 13.33  | 1143.49 | 14.89 | 3.56 | 188.67 | 2.27 | 10.46 | 295.61 | 13.80 | 218.59 | 0.72 | 5048.78 |
| 26     | B73×Tzi8          | 1.50 | 5.30  | 7.70   | 252.23 | 141.65 | 2392.85  | 60.41  | 20.45  | 688.39  | 13.32 | 3.48 | 138.67 | 2.36 | 8.22  | 105.00 | 6.32  | 82.07  | 0.17 | 2935.79 |
| 27     | Association Panel | 1.68 | 81.76 | 100.89 | 475.19 | 298.48 | 10795.70 | 174.01 | 199.09 | 1938.29 | 22.50 | 6.87 | 296.46 | 2.53 | 11.70 | 264.73 | 20.90 | 179.13 | 0.66 | 2334.56 |

Supplementary Table 3. Heritability estimates, their standard errors, among-family variance components ( $\hat{\sigma}_{family}^2$ ), average within-family genetic variance component excluding association panel ( $\hat{\sigma}_{RIL(family)}^2$ ), variance among within-family genetic variance component ( $\text{Var}(\hat{\sigma}_{RIL(family)_p}^2)$ ) and the ratio between among-family and average within-family genetic variance component ( $\hat{\sigma}_{family}^2 / \hat{\sigma}_{RIL(family)}^2$ ), family by environment interaction ( $\hat{\sigma}_{env*family}^2$ ), RILs within family by environment interaction ( $\hat{\sigma}_{env*RIL(family)}^2$ ) and average residual variance ( $\hat{\sigma}_{residual}^2$ ).  $\hat{h}_p^2$  is individual plot basis heritability across all families in NAM,  $\hat{h}_l^2$  is line mean basis heritability across all families in NAM,  $\hat{h}_{lw}^2$  is the average within-family line mean basis heritability, and  $\hat{h}_c^2$  is heritability across the entire experiment described by Cullis *et al.* (2006). The heritability estimators are based on evaluation of the maize NAM population across up to 11 environments.

| Parameter                                                | ASI  | DTA  | DTS   | PH      | EH     | LL        | LW     | ULA    | TSL      | TPB   | CD   | CL      | ERN  | EKPR  | EM      | CM    | KW      | TWKW | KNUM      |
|----------------------------------------------------------|------|------|-------|---------|--------|-----------|--------|--------|----------|-------|------|---------|------|-------|---------|-------|---------|------|-----------|
| $\hat{h}_p^2$                                            | 0.33 | 0.71 | 0.70  | 0.56    | 0.59   | 0.60      | 0.59   | 0.50   | 0.62     | 0.66  | 0.42 | 0.37    | 0.43 | 0.24  | 0.26    | 0.42  | 0.23    | 0.35 | 0.29      |
| S.E.( $\hat{h}_p^2$ )                                    | 0.02 | 0.04 | 0.04  | 0.02    | 0.03   | 0.03      | 0.03   | 0.03   | 0.02     | 0.02  | 0.02 | 0.02    | 0.02 | 0.01  | 0.02    | 0.02  | 0.02    | 0.02 | 0.02      |
| $\hat{h}_l^2$                                            | 0.78 | 0.94 | 0.94  | 0.92    | 0.93   | 0.93      | 0.92   | 0.89   | 0.92     | 0.94  | 0.78 | 0.74    | 0.79 | 0.60  | 0.63    | 0.78  | 0.59    | 0.69 | 0.63      |
| S.E.( $\hat{h}_l^2$ )                                    | 0.01 | 0.01 | 0.01  | 0.01    | 0.01   | 0.01      | 0.01   | 0.01   | 0.01     | 0.01  | 0.02 | 0.01    | 0.01 | 0.02  | 0.03    | 0.01  | 0.03    | 0.02 | 0.02      |
| $\hat{h}_{lw}^2$                                         | 0.71 | 0.78 | 0.85  | 0.90    | 0.85   | 0.88      | 0.87   | 0.80   | 0.88     | 0.88  | 0.73 | 0.70    | 0.67 | 0.60  | 0.54    | 0.73  | 0.52    | 0.63 | 0.62      |
| S.E.( $\hat{h}_{lw}^2$ )                                 | 0.03 | 0.02 | 0.01  | 0.01    | 0.01   | 0.01      | 0.01   | 0.02   | 0.01     | 0.01  | 0.03 | 0.03    | 0.03 | 0.04  | 0.05    | 0.03  | 0.05    | 0.04 | 0.04      |
| $\hat{h}_c^2$                                            | 0.80 | 0.97 | 0.96  | 0.93    | 0.93   | 0.93      | 0.93   | 0.90   | 0.92     | 0.94  | 0.79 | 0.76    | 0.80 | 0.61  | 0.65    | 0.79  | 0.62    | 0.72 | 0.63      |
| $\hat{\sigma}_{family}^2$                                | 0.26 | 9.99 | 11.62 | 66.08   | 75.57  | 1853.01   | 41.06  | 20.59  | 469.46   | 3.88  | 1.41 | 46.03   | 0.41 | 1.29  | 58.36   | 3.74  | 35.78   | 0.11 | 344.05    |
| $\hat{\sigma}_{RIL(family)}^2$                           | 0.84 | 4.63 | 5.84  | 201.63  | 104.11 | 2489.22   | 57.62  | 38.64  | 945.91   | 6.62  | 3.75 | 164.44  | 2.15 | 8.06  | 148.17  | 10.88 | 107.01  | 0.28 | 2861.33   |
| $\text{Var}(\hat{\sigma}_{RIL(family)_p}^2)$             | 0.08 | 3.80 | 4.97  | 1821.00 | 468.91 | 342968.43 | 154.15 | 545.77 | 74193.39 | 13.00 | 0.64 | 2492.19 | 0.22 | 3.89  | 4451.63 | 12.99 | 2323.75 | 0.01 | 750218.94 |
| $\hat{\sigma}_{family}^2 / \hat{\sigma}_{RIL(family)}^2$ | 0.31 | 2.16 | 1.99  | 0.33    | 0.73   | 0.74      | 0.71   | 0.53   | 0.50     | 0.59  | 0.38 | 0.28    | 0.19 | 0.16  | 0.39    | 0.34  | 0.33    | 0.40 | 0.12      |
| $\hat{\sigma}_{env*family}^2$                            | 0.08 | 0.29 | 0.77  | 8.09    | 5.01   | 90.10     | 1.27   | 1.33   | 11.42    | 0.09  | 0.73 | 25.70   | 0.27 | 3.00  | 67.03   | 2.23  | 58.12   | 0.09 | 992.22    |
| $\hat{\sigma}_{env*RIL(family)}^2$                       | 0.39 | 0.70 | 1.02  | 68.50   | 27.51  | 568.00    | 9.61   | 11.01  | 0.00     | 1.05  | 5.69 | 294.32  | 2.69 | 24.14 | 461.08  | 15.53 | 360.26  | 0.49 | 5753.77   |
| $\hat{\sigma}_{residual}^2$                              | 1.76 | 5.00 | 5.71  | 130.80  | 90.01  | 2202.23   | 58.67  | 47.58  | 854.19   | 4.27  | 0.82 | 36.92   | 0.39 | 2.65  | 64.01   | 2.79  | 49.47   | 0.14 | 915.86    |



Supplementary Table 4. Phenotypic difference (PD) between the parents of 26 RIL families comprising the maize NAM and IBM populations.

| Family         | PDasi<br>(day) | PDdta<br>(day) | PDdts<br>(day) | PDph<br>(cm) | PDeh<br>(cm) | PDil<br>(mm) | PDlw<br>(mm) | PDula<br>(degree) | PDtsl<br>(mm) | PDtpb<br>(count) | PDcd<br>(mm) | PDcl<br>(mm) | PDern<br>(count) | PDekpr<br>(count) | PDem<br>(g) | PDcm<br>(g) | PDkw<br>(g) | PDtwkw<br>(g) | PDknum<br>(count) |
|----------------|----------------|----------------|----------------|--------------|--------------|--------------|--------------|-------------------|---------------|------------------|--------------|--------------|------------------|-------------------|-------------|-------------|-------------|---------------|-------------------|
| B73×B97        | 1.57           | 0.55           | 2.08           | -12.72       | -7.54        | -63.35       | 12.82        | -20.66            | 22.44         | 5.87             | -4.03        | -6.47        | -3.51            | -2.89             | -18.56      | -4.32       | -14.90      | 0.61          | -85.33            |
| B73×CML103     | -1.82          | 8.69           | 6.87           | -12.34       | 14.69        | 0.05         | 12.52        | -14.22            | 71.27         | 5.34             | -2.49        | 7.52         | -3.12            | -1.67             | -13.57      | -2.84       | -10.74      | 0.51          | -65.02            |
| B73×CML228     | 1.05           | 18.52          | 19.07          | -12.57       | 8.01         | 156.43       | 4.97         | -9.38             | 55.64         | 3.11             | -5.87        | -4.90        | -3.70            | -4.81             | -31.43      | -8.64       | -25.57      | 0.25          | -109.91           |
| B73×CML247     | 0.43           | 19.50          | 19.99          | -23.05       | -2.12        | 109.00       | 0.58         | -5.13             | 43.56         | 5.25             | -3.44        | -21.21       | -2.28            | -5.45             | -39.07      | -4.60       | -34.33      | -0.58         | -118.53           |
| B73×CML277     | 1.36           | 17.14          | 18.28          | 2.57         | 6.18         | 11.72        | -0.13        | -7.27             | 38.39         | -1.01            | -3.98        | -24.30       | -5.89            | -9.45             | -45.15      | -5.25       | -38.82      | 0.06          | -138.47           |
| B73×CML322     | 0.75           | 9.02           | 10.00          | -27.43       | -7.07        | -4.59        | 4.18         | -27.65            | 29.63         | -0.57            | -3.65        | -13.24       | -1.66            | -1.51             | -26.98      | -5.80       | -21.59      | -1.18         | -41.43            |
| B73×CML333     | 1.24           | 10.74          | 11.95          | 2.81         | 20.27        | 24.23        | 6.95         | -4.72             | -2.91         | 18.03            | -3.75        | -17.89       | -4.28            | -6.22             | -43.76      | -6.72       | -36.81      | -0.49         | -123.80           |
| B73×CML52      | 0.93           | 19.91          | 23.69          | 12.76        | 28.79        | 114.88       | -0.63        | -10.32            | 56.02         | 11.68            | -6.03        | -16.08       | -5.08            | -2.42             | -42.97      | -8.10       | -34.35      | -1.03         | -106.03           |
| B73×CML69      | 0.26           | 14.33          | 14.33          | -9.42        | -0.29        | 174.23       | 21.32        | -6.51             | 26.15         | 3.83             | -2.80        | -16.31       | -5.24            | -7.98             | -40.84      | -4.77       | -35.76      | 0.09          | -132.72           |
| B73×Hp301      | 0.60           | 0.97           | 1.47           | -24.16       | -5.51        | -2.94        | -11.21       | -35.15            | 44.69         | 8.39             | -9.08        | -11.74       | -3.29            | -0.99             | -52.80      | -11.60      | -41.47      | -2.38         | -89.20            |
| B73×II14H      | 0.60           | -4.39          | -4.11          | -17.72       | -24.66       | -22.16       | -15.99       | -31.68            | 61.83         | 5.01             | -4.11        | -26.85       | -3.50            | -6.03             | -45.20      | -10.71      | -35.03      | -0.04         | -129.21           |
| B73×Ki11       | 1.66           | 14.43          | 16.04          | -25.27       | -4.46        | 112.24       | 14.99        | -9.28             | 85.89         | 3.23             | 1.42         | -1.90        | -3.64            | -4.57             | -20.34      | 2.82        | -23.75      | 0.04          | -109.68           |
| B73×Ki3        | 0.59           | 11.24          | 11.92          | -34.01       | -12.36       | -29.50       | 13.86        | -6.35             | -16.84        | 4.45             | -2.91        | -27.06       | -3.49            | -7.29             | -35.98      | -7.40       | -28.45      | -0.02         | -133.28           |
| B73×Ky21       | 1.83           | 6.97           | 8.86           | -17.28       | 3.98         | -35.48       | 7.24         | 0.57              | 18.86         | 9.25             | -3.39        | -6.85        | -4.06            | -2.51             | -19.48      | -0.84       | -17.90      | 0.40          | -105.16           |
| B73×M162W      | -1.65          | 11.61          | 10.18          | -22.74       | -3.83        | -14.75       | 14.10        | -19.66            | 22.01         | 1.94             | -3.10        | -22.94       | -2.54            | -5.03             | -23.66      | -7.42       | -15.44      | 0.76          | -91.63            |
| B73×M37W       | 1.41           | 5.55           | 7.32           | -17.22       | -14.29       | 59.95        | 5.15         | -30.85            | 91.95         | 4.20             | -3.36        | -11.84       | -4.06            | -4.80             | -38.68      | -6.78       | -32.44      | -0.13         | -108.82           |
| B73×Mo17 (IBM) | 1.95           | -1.20          | 0.49           | -18.77       | -16.82       | -153.71      | -0.21        | -20.21            | 56.02         | -1.81            | -7.96        | 22.18        | -5.83            | 1.93              | -19.56      | -7.75       | -12.14      | 0.45          | -73.75            |
| B73×Mo18W      | 2.89           | 13.01          | 15.49          | -16.82       | -3.74        | 132.94       | 1.40         | -10.78            | 127.35        | 16.70            | -3.84        | -22.40       | -2.25            | -6.00             | -44.24      | -8.72       | -35.16      | -0.88         | -119.22           |
| B73×MS71       | -0.12          | -2.32          | -2.83          | -41.02       | -27.53       | -25.45       | -16.23       | -11.46            | -38.09        | 3.74             | -4.20        | -3.21        | -3.65            | -3.98             | -31.87      | -2.80       | -27.84      | -0.10         | -90.02            |
| B73×NC350      | -0.66          | 8.13           | 7.34           | -40.62       | -24.44       | 78.45        | -14.88       | -7.55             | 61.09         | 4.16             | -5.85        | -27.64       | -2.89            | -6.07             | -44.24      | -10.96      | -33.73      | -0.82         | -115.68           |
| B73×NC358      | -0.35          | 3.63           | 3.10           | -21.43       | -18.96       | -151.62      | 1.27         | 2.70              | -60.25        | 7.49             | -5.36        | -7.13        | -4.60            | -2.55             | -28.48      | -5.74       | -22.71      | 0.01          | -93.48            |
| B73×Oh43       | 0.19           | -3.23          | -3.54          | -31.78       | -27.06       | -74.79       | 1.55         | -28.42            | 19.81         | -0.55            | -2.86        | 8.67         | -2.43            | 1.82              | -18.07      | -5.39       | -12.11      | -0.71         | -18.47            |
| B73×Oh7B       | 0.85           | 9.07           | 10.14          | -9.05        | 1.66         | -13.43       | 2.90         | -2.85             | 48.68         | 0.78             | -6.83        | 7.65         | -2.74            | -0.76             | -18.53      | -6.04       | -12.58      | 0.20          | -54.50            |
| B73×P39        | 0.97           | -8.80          | -8.18          | -55.14       | -43.85       | -187.81      | -31.09       | -48.52            | -36.16        | 3.59             | -5.42        | -19.69       | -2.98            | -3.14             | -46.75      | -11.31      | -36.05      | -1.35         | -107.19           |
| B73×Tx303      | 1.81           | 8.69           | 10.67          | 14.33        | 18.42        | 13.14        | 7.77         | -8.23             | 71.17         | 14.38            | -2.47        | -17.29       | -3.53            | -4.07             | -29.78      | -7.98       | -22.82      | 0.75          | -100.61           |
| B73×Tzi8       | 1.73           | 14.76          | 16.84          | 3.84         | 19.36        | 26.90        | 14.76        | -6.60             | 43.82         | 6.73             | -2.51        | -15.95       | -2.70            | -4.64             | -45.67      | -8.16       | -37.09      | -0.64         | -127.28           |

Supplementary Table 5. Parental BLUPs for NAM population.

| Line   | ASI<br>(day) | DTA<br>(day) | DTS<br>(day) | PH<br>(cm) | EH<br>(cm) | LL<br>(mm) | LW<br>(mm) | ULA<br>(degree) | TSL<br>(mm) | TPB<br>(count) | CD<br>(mm) | CL<br>(mm) | ERN<br>(count) | EKPR<br>(count) | EM<br>(g) | CM<br>(g) | KW<br>(g) | TWKW<br>(g) | KNUM<br>(count) |
|--------|--------------|--------------|--------------|------------|------------|------------|------------|-----------------|-------------|----------------|------------|------------|----------------|-----------------|-----------|-----------|-----------|-------------|-----------------|
| B73    | 1.05         | 73.96        | 75.01        | 170.88     | 83.34      | 767.39     | 89.00      | 78.22           | 301.61      | 6.71           | 29.13      | 134.64     | 16.57          | 24.78           | 91.55     | 20.75     | 70.96     | 4.56        | 313.69          |
| B97    | 2.62         | 74.51        | 77.08        | 158.16     | 75.80      | 704.04     | 101.81     | 57.57           | 324.05      | 12.59          | 25.11      | 128.17     | 13.06          | 21.88           | 72.99     | 16.43     | 56.06     | 5.17        | 228.36          |
| CML103 | -0.76        | 82.64        | 81.87        | 158.54     | 98.03      | 767.43     | 101.52     | 64.00           | 372.88      | 12.06          | 26.65      | 142.16     | 13.46          | 23.11           | 77.98     | 17.91     | 60.22     | 5.07        | 248.67          |
| CML228 | 2.10         | 92.48        | 94.08        | 158.31     | 91.34      | 923.82     | 93.97      | 68.84           | 357.25      | 9.83           | 23.27      | 129.74     | 12.87          | 19.97           | 60.13     | 12.11     | 45.39     | 4.81        | 203.78          |
| CML247 | 1.48         | 93.46        | 95.00        | 147.83     | 81.21      | 876.39     | 89.58      | 73.10           | 345.17      | 11.97          | 25.69      | 113.43     | 14.29          | 19.32           | 52.48     | 16.15     | 36.63     | 3.98        | 195.16          |
| CML277 | 2.42         | 91.10        | 93.29        | 173.45     | 89.52      | 779.10     | 88.87      | 70.96           | 340.00      | 5.70           | 25.15      | 110.34     | 10.68          | 15.33           | 46.40     | 15.50     | 32.15     | 4.62        | 175.22          |
| CML322 | 1.81         | 82.97        | 85.01        | 143.45     | 76.26      | 762.79     | 93.18      | 50.57           | 331.24      | 6.15           | 25.48      | 121.40     | 14.91          | 23.27           | 64.57     | 14.95     | 49.37     | 3.38        | 272.26          |
| CML333 | 2.29         | 84.70        | 86.96        | 173.69     | 103.60     | 791.62     | 95.95      | 73.50           | 298.70      | 24.74          | 25.38      | 116.75     | 12.29          | 18.56           | 47.79     | 14.02     | 34.16     | 4.07        | 189.89          |
| CML52  | 1.99         | 93.87        | 98.70        | 183.64     | 112.13     | 882.27     | 88.36      | 67.90           | 357.63      | 18.39          | 23.11      | 118.56     | 11.49          | 22.35           | 48.59     | 12.65     | 36.62     | 3.53        | 207.66          |
| CML69  | 1.31         | 88.29        | 89.34        | 161.46     | 83.05      | 941.62     | 110.32     | 71.72           | 327.76      | 10.54          | 26.33      | 118.33     | 11.33          | 16.80           | 50.71     | 15.98     | 35.20     | 4.65        | 180.97          |
| Hp301  | 1.65         | 74.93        | 76.48        | 146.72     | 77.83      | 764.45     | 77.79      | 43.08           | 346.30      | 15.11          | 20.05      | 122.90     | 13.28          | 23.78           | 38.75     | 9.14      | 29.49     | 2.18        | 224.49          |
| II14H  | 1.65         | 69.57        | 70.89        | 153.16     | 58.68      | 745.22     | 73.00      | 46.54           | 363.44      | 11.73          | 25.02      | 107.78     | 13.07          | 18.75           | 46.35     | 10.04     | 35.93     | 4.52        | 184.48          |
| Ki11   | 2.71         | 88.38        | 91.04        | 145.60     | 78.88      | 879.63     | 103.99     | 68.94           | 387.50      | 9.94           | 30.55      | 132.74     | 12.94          | 20.21           | 71.21     | 23.57     | 47.21     | 4.60        | 204.01          |
| Ki3    | 1.64         | 85.20        | 86.92        | 136.87     | 70.98      | 737.89     | 102.86     | 71.87           | 284.77      | 11.16          | 26.22      | 107.58     | 13.08          | 17.49           | 55.57     | 13.34     | 42.51     | 4.53        | 180.41          |
| Ky21   | 2.88         | 80.92        | 83.87        | 153.60     | 87.31      | 731.90     | 96.24      | 78.80           | 320.47      | 15.97          | 25.75      | 127.79     | 12.51          | 22.27           | 72.08     | 19.90     | 53.06     | 4.96        | 208.53          |
| M162W  | -0.59        | 85.56        | 85.18        | 148.14     | 79.50      | 752.64     | 103.09     | 58.56           | 323.62      | 8.66           | 26.03      | 111.70     | 14.03          | 19.75           | 67.90     | 13.32     | 55.52     | 5.32        | 222.07          |
| M37W   | 2.46         | 79.51        | 82.32        | 153.65     | 69.05      | 827.34     | 94.15      | 47.37           | 393.56      | 10.91          | 25.77      | 122.80     | 12.51          | 19.98           | 52.87     | 13.96     | 38.52     | 4.43        | 204.88          |
| Mo17   | 3.00         | 72.76        | 75.49        | 152.11     | 66.52      | 613.68     | 88.78      | 58.01           | 357.63      | 4.91           | 21.17      | 156.82     | 10.74          | 26.71           | 71.99     | 13.00     | 58.82     | 5.01        | 239.95          |
| Mo18W  | 3.95         | 86.96        | 90.49        | 154.06     | 79.59      | 900.33     | 90.39      | 67.45           | 428.96      | 23.42          | 25.30      | 112.24     | 14.32          | 18.78           | 47.32     | 12.03     | 35.80     | 3.68        | 194.47          |
| MS71   | 0.94         | 71.63        | 72.18        | 129.86     | 55.80      | 741.93     | 72.77      | 66.77           | 263.52      | 10.45          | 24.93      | 131.43     | 12.92          | 20.80           | 59.69     | 17.95     | 43.12     | 4.46        | 223.67          |
| NC350  | 0.40         | 82.09        | 82.35        | 130.26     | 58.89      | 845.84     | 74.12      | 70.67           | 362.70      | 10.88          | 23.28      | 107.00     | 13.68          | 18.70           | 47.31     | 9.79      | 37.24     | 3.74        | 198.01          |
| NC358  | 0.70         | 77.58        | 78.10        | 149.45     | 64.38      | 615.77     | 90.26      | 80.92           | 241.36      | 14.21          | 23.77      | 127.51     | 11.98          | 22.23           | 63.07     | 15.01     | 48.25     | 4.57        | 220.22          |
| Oh43   | 1.24         | 70.73        | 71.47        | 139.10     | 56.27      | 692.60     | 90.55      | 49.80           | 321.42      | 6.16           | 26.27      | 143.31     | 14.14          | 26.59           | 73.48     | 15.36     | 58.85     | 3.85        | 295.22          |
| Oh7B   | 1.90         | 83.02        | 85.15        | 161.83     | 85.00      | 753.95     | 91.90      | 75.38           | 350.29      | 7.49           | 22.30      | 142.29     | 13.84          | 24.01           | 73.02     | 14.71     | 58.38     | 4.76        | 259.20          |
| P39    | 2.03         | 65.15        | 66.82        | 115.73     | 39.48      | 579.58     | 57.91      | 29.70           | 265.45      | 10.30          | 23.71      | 114.95     | 13.60          | 21.64           | 44.80     | 9.44      | 34.91     | 3.21        | 206.50          |
| Tx303  | 2.86         | 82.64        | 85.68        | 185.21     | 101.76     | 780.53     | 96.77      | 70.00           | 372.78      | 21.09          | 26.66      | 117.34     | 13.04          | 20.70           | 61.77     | 12.77     | 48.14     | 5.31        | 213.08          |
| Tzi8   | 2.78         | 88.72        | 91.85        | 174.71     | 102.69     | 794.29     | 103.76     | 71.62           | 345.43      | 13.44          | 26.62      | 118.69     | 13.87          | 20.14           | 45.88     | 12.59     | 33.87     | 3.92        | 186.41          |

Supplementary Table 6.  $r^2$ ,  $\hat{\beta}$  and p-value of regressions of within-family heritability ( $\overline{\hat{h}_{fw}^2}$ ) on the absolute value of phenotypic difference (PD), genetic distance estimate from SSR markers (GDssr) and genetic distance estimate from SNP markers (GDsnp).

| trait | $\overline{\hat{h}_{fw}^2}$ on PD |               |                   | $\overline{\hat{h}_{fw}^2}$ on GDssr |               |         | $\overline{\hat{h}_{fw}^2}$ on GDsnp |               |                 |
|-------|-----------------------------------|---------------|-------------------|--------------------------------------|---------------|---------|--------------------------------------|---------------|-----------------|
|       | $r^2$                             | $\hat{\beta}$ | p-value           | $r^2$                                | $\hat{\beta}$ | p-value | $r^2$                                | $\hat{\beta}$ | p-value         |
| ASI   | 0.1348                            | 0.0309        | 0.0650            | 0.0036                               | -0.0958       | 0.7713  | 0.0041                               | -0.1558       | 0.4412          |
| DTA   | 0.5239                            | 0.0071        | < <b>0.0001</b> * | 0.0218                               | 0.2367        | 0.4712  | 0.0682                               | 0.6330        | 0.1553          |
| DTS   | 0.4550                            | 0.0048        | <b>0.0002</b> *   | 0.0384                               | 0.2478        | 0.3373  | 0.0417                               | 0.3908        | 0.2531          |
| PH    | 0.0118                            | -0.0002       | 0.5970            | 0.0257                               | 0.1149        | 0.4345  | 0.0168                               | 0.1407        | 0.4560          |
| EH    | 0.0059                            | 0.0002        | 0.7094            | 0.0065                               | 0.0685        | 0.6944  | 0.0553                               | 0.3012        | 0.7330          |
| LL    | 0.0035                            | <0.0001       | 0.7750            | 0.0611                               | -0.2011       | 0.2235  | 0.0003                               | 0.0215        | 0.2979          |
| LW    | 0.0015                            | -0.0002       | 0.8508            | 0.0006                               | 0.0201        | 0.9078  | 0.0700                               | 0.3364        | 0.5751          |
| ULA   | 0.4830                            | 0.0057        | <b>0.0001</b> *   | 0.0414                               | 0.5653        | 0.3186  | 0.1765                               | 1.7655        | 0.6896          |
| TSL   | 0.5326                            | 0.0007        | < <b>0.0001</b> * | 0.0007                               | 0.0192        | 0.8979  | 0.0131                               | 0.1261        | 0.9024          |
| TPB   | 0.6029                            | 0.0077        | < <b>0.0001</b> * | 0.0257                               | -0.2107       | 0.4336  | 0.0440                               | -0.4165       | 0.8668          |
| CD    | 0.0650                            | -0.0065       | 0.2088            | 0.0037                               | 0.0783        | 0.7677  | 0.1840                               | 0.8345        | 0.1515          |
| CL    | 0.0071                            | 0.0006        | 0.6818            | 0.1411                               | 0.6198        | 0.0586  | 0.0068                               | 0.2053        | 0.1073          |
| ERN   | 0.0491                            | -0.0095       | 0.2767            | 0.0005                               | 0.0290        | 0.9139  | 0.0199                               | 0.2773        | 0.4867          |
| EKPR  | 0.0233                            | 0.0046        | 0.4570            | 0.0686                               | 0.5017        | 0.1961  | 0.0057                               | 0.2181        | <b>0.0243</b> * |
| EM    | 0.0760                            | -0.0031       | 0.1727            | 0.0762                               | 0.9936        | 0.1722  | 0.0044                               | -0.3626       | 0.3434          |
| CM    | 0.3168                            | -0.0169       | <b>0.0028</b> *   | 0.0035                               | 0.1389        | 0.7735  | 0.0179                               | -0.4745       | 0.7583          |
| KW    | 0.1008                            | -0.0044       | 0.1140            | 0.0564                               | 0.8958        | 0.2428  | 0.0183                               | -0.7729       | 0.2775          |
| TWKW  | 0.0371                            | -0.0307       | 0.3458            | 0.0097                               | 0.2334        | 0.6322  | 0.0170                               | -0.4676       | 0.1045          |
| KNUM  | 0.0001                            | <0.0001       | 0.9687            | 0.0010                               | -0.0683       | 0.8762  | 0.0555                               | -0.7580       | 0.6397          |

\*Significant at 5% level
